# Supplementary material for: Integrated and Metal Free Synthesis of Dimethyl Carbonate and Glycidol from Glycerol Derived 1,3-Dichloro-2-propanol via CO2 Capture
Source: MDPI journal article supplement (doi:10.3390/cleantechnol3040041), 2021-09-24
Supplement: s1 [file s1]

# Supporting information

## Integrated and Metal Free Synthesis of Dimethyl Carbonate and Glycidol from Glycerol Derived 1,3-Dichloro-2-propanol via CO<sub>2</sub> Capture

Santosh Khokarale <sup>1,\*</sup>, Ganesh Shelke <sup>1</sup> and Jyri-Pekka Mikkola <sup>1,2,\*</sup>

<sup>1</sup> Technical Chemistry, Chemical-Biological Centre, Department of Chemistry, Umeå University, SE-90187 Umeå, Sweden; ganesh.shelke@umu.se

<sup>2</sup> Industrial Chemistry & Reaction Engineering, Johan Gadolin Process Chemistry Centre, Department of Chemical Engineering, Åbo Akademi University, FI-20500 Åbo-Turku, Finland

\* Correspondence: santosh.khokarale@umu.se (S.K.); jyri-pekka.mikkola@umu.se (J.-P.M.)

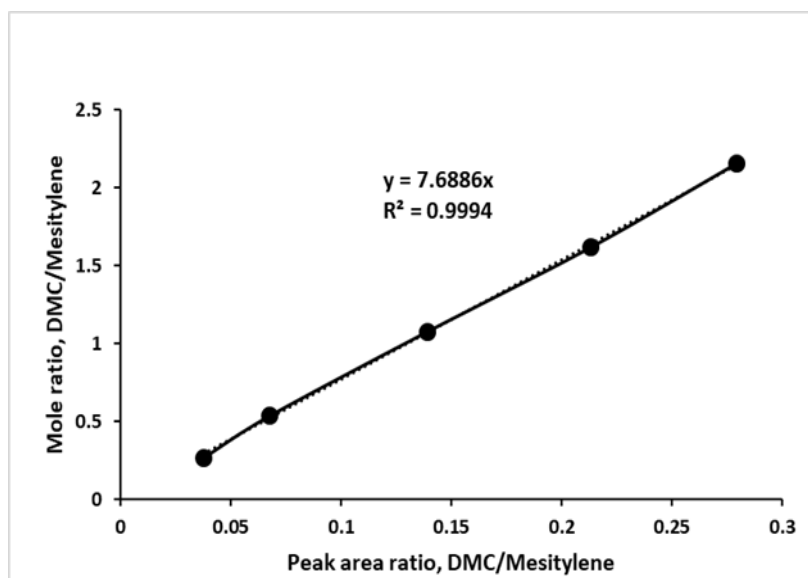

**Figure S1.** Calibration curve for the quantification of recovered dimethyl carbonate (Gas chromatography method)

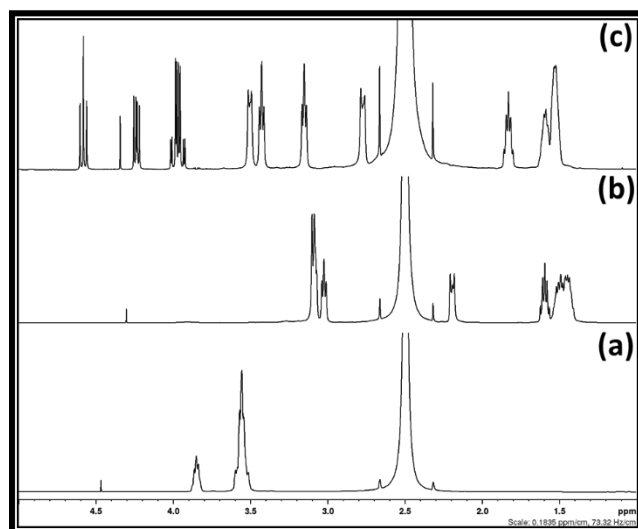

**Figure S2.**  $^1\text{H}$  NMR spectra of the (a) 1,3-dichloro-2-propanol, (b) DBU and, (c) Reaction mixture after equivalent interaction of 1,3-dichloro-2-propanol, DBU and  $\text{CO}_2$  in DMSO (NMR analysis with capillary filled with  $\text{D}_2\text{O}$ ).

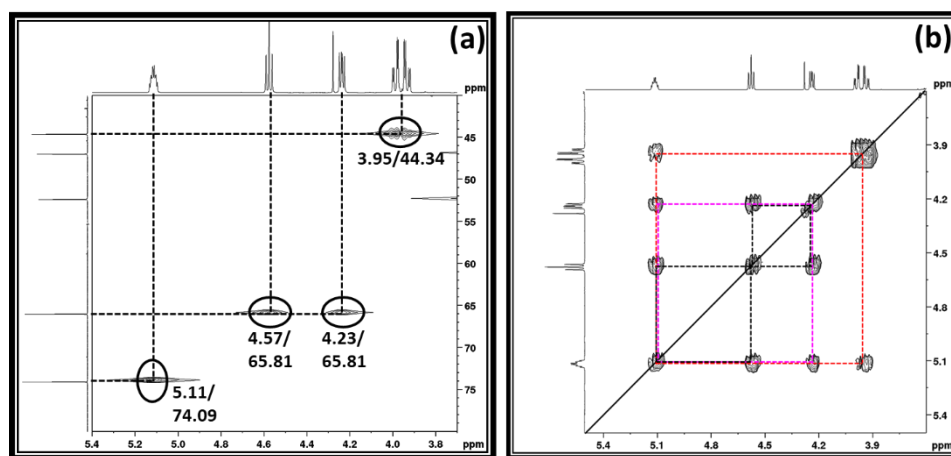

**Figure S3.**  $^1\text{H}$ - $^{13}\text{C}$  HSQC (a), and  $^1\text{H}$ - $^1\text{H}$  COSY (b) NMR spectra of the reaction mixture after equivalent interaction of 1,3-dichloro-2-propanol, DBU and  $\text{CO}_2$  in DMSO

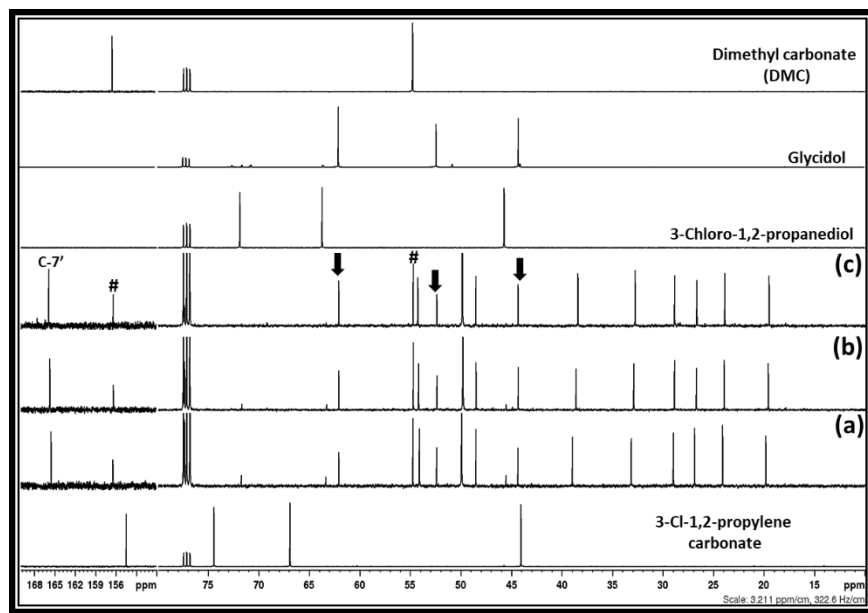

**Figure S4-a)**  $^{13}\text{C}$  NMR spectra for the DBU catalyzed transesterification of 3-chloro-1,2-propylenecarbonate in methanol at 35 °C, (a) 30 min, (b) 1 h, and (c) 2 h. (Downward arrows and # sign indicate that the carbon atoms belonging to the glycidol and DMC, respectively).

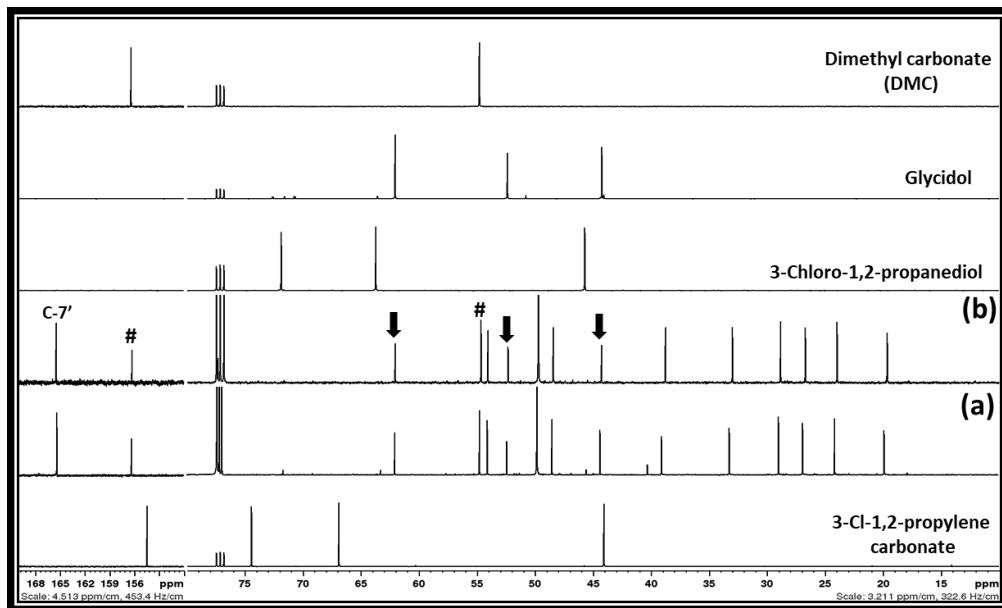

**Figure S4-b)**  $^{13}\text{C}$  NMR spectra for the DBU catalyzed transesterification of 3-chloro-1,2-propylenecarbonate in methanol at 50 °C, (a) 15 min, and (b) 30 min. (Downward arrows and # sign indicate the carbon atoms belonging to the glycidol and DMC, respectively).

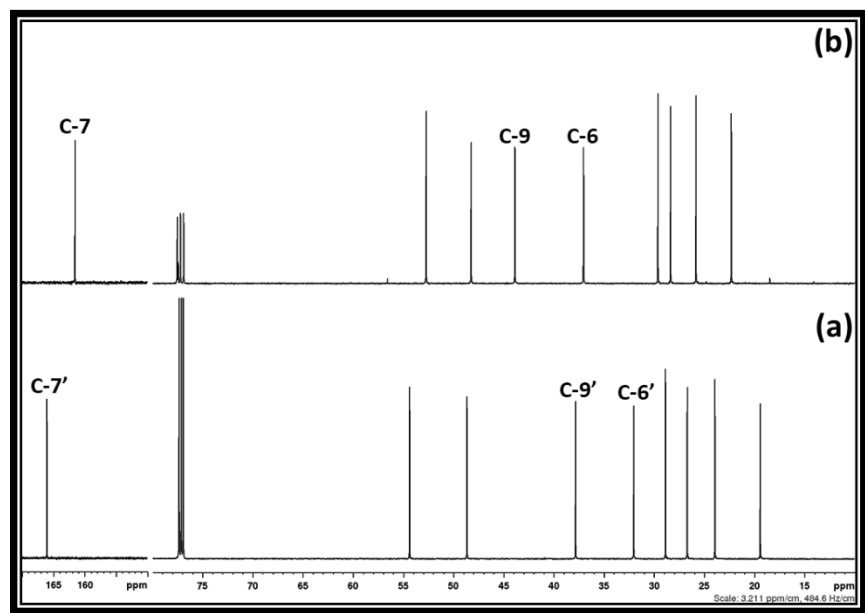

**Figure S5.**  $^{13}\text{C}$  NMR spectra a) [DBUH][Cl] salt and, b) recovered DBU
